# Supplementary material for: ZnS and Ag2Mo2O7 regulate interface engineering by constructing S-scheme heterojunctions to facilitate photocatalytic hydrogen production
Source: Royal Society of Chemistry journal article supplement (doi:10.1039/d2nj03102g), 2022-01-01
Supplement: d2nj03102g1.pdf [file d2nj03102g1.pdf]

## Supporting Information

### ZnS and Ag<sub>2</sub>Mo<sub>2</sub>O<sub>7</sub> regulate interface engineering by constructing S-scheme heterojunctions to facilitate photocatalytic hydrogen production

Zhenlu Liu<sup>1</sup>, Jing Xu<sup>\*1,3,4</sup>, Jiandong Wu<sup>2</sup>, Ye Liu<sup>1</sup>, Lijun Ma<sup>1</sup>, Linying Hu<sup>1</sup>

<sup>1</sup> School of Chemistry and Chemical Engineering, North Minzu University, Yinchuan 750021, PR China

<sup>2</sup> School of Materials Science and Engineering, North Minzu University, Yinchuan 750021, PR China

<sup>3</sup> Ningxia Key Laboratory of Solar Chemical Conversion Technology, North Minzu University, Yinchuan 750021, PR China

<sup>4</sup> Key Laboratory for Chemical Engineering and Technology, State Ethnic Affairs Commission, North Minzu University, Yinchuan 750021, PR China

Email: wgyxj2000@163.com

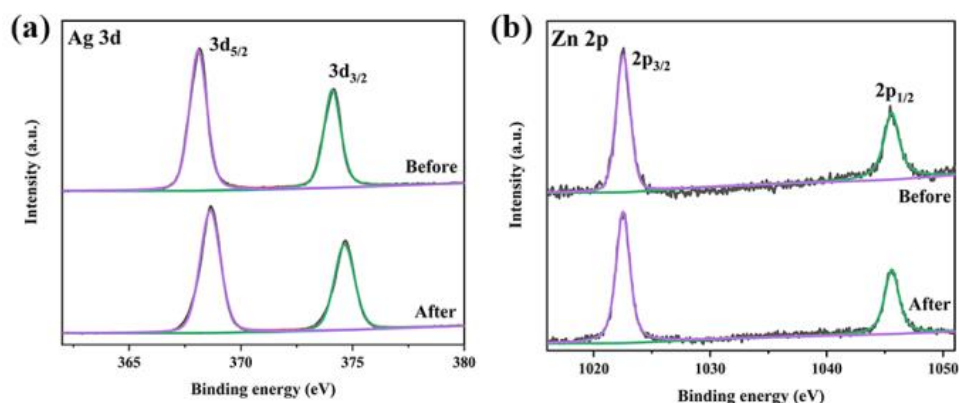

Figure S1 XPS comparison of Zn and Ag before and after reaction.

Table 1 Comparison with other reported ZnS performance.

| Material                                               | Sacrificial agent                                 | Hydrogen evolution                              | Light         |                  |
|--------------------------------------------------------|---------------------------------------------------|-------------------------------------------------|---------------|------------------|
| CuGaS <sub>2</sub> /ZnS                                | Na <sub>2</sub> S/Na <sub>2</sub> SO <sub>3</sub> | 137 μmol·g <sup>-1</sup> h <sup>-1</sup>        | 300 W Xe      | [1]              |
| ZnO/ZnS                                                | /                                                 | 247 μmol·g <sup>-1</sup> h <sup>-1</sup>        | 300 W Xe      | [2]              |
| CeO <sub>2</sub> /ZnS                                  | Na <sub>2</sub> S/Na <sub>2</sub> SO <sub>3</sub> | 417 μmol·g <sup>-1</sup> h <sup>-1</sup>        | 300 W Xe      | [3]              |
| ZIF-8/ZnS                                              | TEOA                                              | 741.8 μmol·g <sup>-1</sup> h <sup>-1</sup>      | 300 W Xe      | [4]              |
| ZnO/ZnS                                                | Methanol                                          | 757 μmol·g <sup>-1</sup> h <sup>-1</sup>        | /             | [5]              |
| NiCo <sub>2</sub> O <sub>4</sub> /ZnS                  | Na <sub>2</sub> S/Na <sub>2</sub> SO <sub>3</sub> | 880 μmol·g <sup>-1</sup> h <sup>-1</sup>        | 300 W Xe      | [6]              |
| ZnO/ZnS                                                | Na <sub>2</sub> S/Na <sub>2</sub> SO <sub>3</sub> | 2.4 mmol g <sup>-1</sup> h <sup>-1</sup>        | 300 W Xe      | [7]              |
| Pt/SnO <sub>2</sub> /ZnS                               | TEOA                                              | 2.17 mmol g <sup>-1</sup> h <sup>-1</sup>       | 300 W Xe      | [8]              |
| ZrO <sub>2</sub> /SnS <sub>2</sub> /ZnS                | Na <sub>2</sub> S/Na <sub>2</sub> SO <sub>3</sub> | 928.1 μmol·g <sup>-1</sup> h <sup>-1</sup>      | 300 W Xe      | [9]              |
| Bi <sub>2</sub> S <sub>3</sub> /ZnS                    | Na <sub>2</sub> S/Na <sub>2</sub> SO <sub>3</sub> | 176.2 μmol·h <sup>-1</sup>                      | 300 W Xe      | [10]             |
| g-C <sub>3</sub> N <sub>4</sub> /ZnS                   | Na <sub>2</sub> S/Na <sub>2</sub> SO <sub>3</sub> | 713.7 μmol·g <sup>-1</sup> h <sup>-1</sup>      | 300 W Xe      | [11]             |
| ZnO/ZnS                                                | Na <sub>2</sub> S                                 | 494.8 μmol·g <sup>-1</sup> h <sup>-1</sup>      | 150 W Xe      | [12]             |
| Cu <sub>3</sub> P/ZnS                                  | Na <sub>2</sub> S/Na <sub>2</sub> SO <sub>3</sub> | 792 μmol·g <sup>-1</sup> h <sup>-1</sup>        | 300 W Xe      | [13]             |
| Pt/ZnO/ZnS                                             | H <sub>2</sub> O                                  | 87.6 μmol·g <sup>-1</sup> h <sup>-1</sup>       | 300 W Xe      | [14]             |
| ZnO/ZnS                                                | Na <sub>2</sub> S/Na <sub>2</sub> SO <sub>3</sub> | 15.7 μmol·g <sup>-1</sup> h <sup>-1</sup>       | 350 W Xe      | [15]             |
| Cu <sub>3</sub> P/ZnS                                  | Na <sub>2</sub> S/Na <sub>2</sub> SO <sub>3</sub> | 14937 μmol·g <sup>-1</sup> h <sup>-1</sup>      | 250 W QTH     | [16]             |
| AgIn <sub>5</sub> S <sub>8</sub> /ZnS                  | Na <sub>2</sub> S/Na <sub>2</sub> SO <sub>3</sub> | 932.8 μmol·g <sup>-1</sup> h <sup>-1</sup>      | 300 W Xe      | [17]             |
| Ti <sub>3</sub> C <sub>2</sub> /ZnS                    | Lactic acid                                       | 502.6 μmol·g <sup>-1</sup> h <sup>-1</sup>      | 300 W Xe      | [18]             |
| MoS <sub>2</sub> /ZnS                                  | Methanol                                          | 606 μmol·g <sup>-1</sup> h <sup>-1</sup>        | Hg-pen        | [19]             |
| NiS <sub>2</sub> /g-C <sub>3</sub> N <sub>4</sub> /ZnS | TEOA                                              | 348.5 μmol·g <sup>-1</sup> h <sup>-1</sup>      | 300 W Xe      | [20]             |
| rGO/ZnS                                                | Methanol                                          | 108.8 μmol·g <sup>-1</sup> h <sup>-1</sup>      | 500 W Xe      | [21]             |
| <b>Ag<sub>2</sub>Mo<sub>2</sub>O<sub>7</sub>/ZnS</b>   | <b>TEOA</b>                                       | <b>871.9 μmol·g<sup>-1</sup> h<sup>-1</sup></b> | <b>5 W Xe</b> | <b>This work</b> |

## Reference

- [1] M. Zhao, F. Huang, H. Lin, J. Zhou, J. Xu, Q. Wu, Y. Wang, CuGaS<sub>2</sub>-ZnS p-n nanoheterostructures: a promising visible light photo-catalyst for water-splitting hydrogen production, *Nanoscale*, 8 (2016) 16670-16676.
- [2] Y. Piñá-Pérez, O. Aguilar-Martínez, P. Acevedo-Peña, C.E. Santolalla-Vargas, S. Oros-Ruíz, F.

Galindo-Hernández, R. Gómez, F. Tzompantzi, Novel ZnS-ZnO composite synthesized by the solvothermal method through the partial sulfidation of ZnO for H<sub>2</sub> production without sacrificial agent, *Applied Catalysis B: Environmental*, 230 (2018) 125-134.

[3] C. Xia, C. Xue, W. Bian, Y. Wei, J. Zhang, Morphology controlling strategy of ZnS/CeO<sub>2</sub> catalysts to enhance the photocatalytic performance for hydrogen production, *JCIS Open*, 4 (2021).

[4] J. Zhou, J. Zhao, R. Liu, Defect engineering of zeolite imidazole framework derived ZnS nanosheets towards enhanced visible light driven photocatalytic hydrogen production, *Applied Catalysis B: Environmental*, 278 (2020).

[5] X. Yang, H. Liu, T. Li, B. Huang, W. Hu, Z. Jiang, J. Chen, Q. Niu, Preparation of flower-like ZnO@ZnS core-shell structure enhances photocatalytic hydrogen production, *International Journal of Hydrogen Energy*, 45 (2020) 26967-26978.

[6] C.-J. Chang, Z. Lee, M. Wei, C.-C. Chang, K.-W. Chu, Photocatalytic hydrogen production by magnetically separable Fe<sub>3</sub>O<sub>4</sub>@ZnS and NiCo<sub>2</sub>O<sub>4</sub>@ZnS core-shell nanoparticles, *International Journal of Hydrogen Energy*, 40 (2015) 11436-11443.

[7] H. Ren, K. Ye, H. Chen, F. Wang, Y. Hu, Q. Shi, H. Yu, R. Lv, M. Chen, ZnO@ZnS core-shell nanorods with homologous heterogeneous interface to enhance photocatalytic hydrogen production, *Colloids and Surfaces A: Physicochemical and Engineering Aspects*, 652 (2022).

[8] X. Ji, H. Xu, S. Liang, L. Gan, R. Zhang, X. Wang, 3D ordered macroporous Pt/ZnS@ZnO core-shell heterostructure for highly effective photocatalytic hydrogen evolution, *International Journal of Hydrogen Energy*, 47 (2022) 17640-17649.

[9] Y. Tian, X. Yang, L. Li, Y. Zhu, Q. Wu, Y. Li, F. Ma, Y. Yu, A direct dual Z-scheme 3DOM SnS<sub>2</sub>-ZnS/ZrO<sub>2</sub> composite with excellent photocatalytic degradation and hydrogen production performance, *Chemosphere*, 279 (2021) 130882.

[10] M. Nawaz, Morphology-controlled preparation of Bi<sub>2</sub>S<sub>3</sub>-ZnS chloroplast-like structures, formation mechanism and photocatalytic activity for hydrogen production, *Journal of Photochemistry and Photobiology A: Chemistry*, 332 (2017) 326-330.

[11] X. Hao, J. Zhou, Z. Cui, Y. Wang, Y. Wang, Z. Zou, Zn-vacancy mediated electron-hole separation in ZnS/g-C<sub>3</sub>N<sub>4</sub> heterojunction for efficient visible-light photocatalytic hydrogen production, *Applied Catalysis B: Environmental*, 229 (2018) 41-51.

[12] E. Hong, J.H. Kim, Oxide content optimized ZnS-ZnO heterostructures via facile thermal treatment process for enhanced photocatalytic hydrogen production, *International Journal of Hydrogen Energy*, 39 (2014) 9985-9993.

[13] W. Cai, F. Zhang, Y. Wang, D. Li, A novel I-type 0D/0D ZnS@Cu<sub>3</sub>P heterojunction for photocatalytic hydrogen evolution, *Inorganic Chemistry Communications*, 134 (2021).

[14] S. Sun, D. Ren, M. Yang, J. Cui, Q. Yang, S. Liang, In-situ construction of direct Z-scheme sea-urchin-like ZnS/SnO<sub>2</sub> heterojunctions for boosted photocatalytic hydrogen production, *International Journal of Hydrogen Energy*, 47 (2022) 9201-9208.

[15] J. Jiang, G. Wang, Y. Shao, J. Wang, S. Zhou, Y. Su, Step-scheme ZnO@ZnS hollow microspheres for improved photocatalytic H<sub>2</sub> production performance, *Chinese Journal of Catalysis*, 43 (2022) 329-338.

[16] R. Rameshbabu, P. Ravi, G. Pecchi, E.J. Delgado, R.V. Mangalaraja, M. Sathish, Black Trumpet Mushroom-like ZnS incorporated with Cu<sub>3</sub>P: Noble metal free photocatalyst for superior photocatalytic H<sub>2</sub> production, *J Colloid Interface Sci*, 590 (2021) 82-93.

[17] S. Zhu, Y. Zhang, X. Qian, X. Wang, W. Su, Zn defect-mediated Z-scheme electron-hole

separation in AgIn<sub>5</sub>S<sub>8</sub>/ZnS heterojunction for enhanced visible-light photocatalytic hydrogen evolution, *Applied Surface Science*, 504 (2020).

[18] L. Tie, S. Yang, C. Yu, H. Chen, Y. Liu, S. Dong, J. Sun, J. Sun, In situ decoration of ZnS nanoparticles with Ti<sub>3</sub>C<sub>2</sub> MXene nanosheets for efficient photocatalytic hydrogen evolution, *J Colloid Interface Sci*, 545 (2019) 63-70.

[19] J.E. Samaniego-Benitez, L. Lartundo-Rojas, A. García-García, H.A. Calderón, A. Mantilla, One-step synthesis and photocatalytic behavior for H<sub>2</sub> production from water of ZnS/MoS<sub>2</sub> composite material, *Catalysis Today*, 360 (2021) 99-105.

[20] D. Wei, Y. Liu, X. Shao, X. Zhao, S. Ghufraan, L. Wang, R. Wu, J. Guo, C. Yang, Cooperative effects of zinc–nickel sulfides as a dual cocatalyst for the enhanced photocatalytic hydrogen evolution activity of g-C<sub>3</sub>N<sub>4</sub>, *Journal of Environmental Chemical Engineering*, 10 (2022).

[21] M. Sathishkumar, M. Saroja, M. Venkatachalam, P. Gowthaman, S. Kannan, A. Balamurugan, rGO encapsulated ZnS photocatalysts for enhanced hydrogen evolution, *Materials Letters*, 323 (2022).
